# Supplementary material for: Evaluation of a Web-Based Training Model for Family Peer Advocates in Children’s Mental Health
Source: Atypon-hosted journal article supplement (doi:10.1176/appi.ps.201900365), 2020-01-08
Supplement: appi.ps.201900365.ds001.pdf [file appi.ps.201900365.ds001.pdf]

## WEB-BASED PEP TRAINING

## Online Supplement

Table A. Sociodemographic and Employment Characteristics of Web-based Training Participants

| <i>N</i> =251                                              | Completers ( <i>N</i> =140) |    | Non-Completers ( <i>N</i> =111) |    |
|------------------------------------------------------------|-----------------------------|----|---------------------------------|----|
|                                                            | <i>N</i>                    | %  | <i>N</i>                        | %  |
| <b>Age group</b>                                           |                             |    |                                 |    |
| 18-29 years                                                | 4                           | 3  | 12                              | 11 |
| 30-39 years                                                | 50                          | 36 | 36                              | 32 |
| 40-49 years                                                | 47                          | 34 | 29                              | 26 |
| 50-59 years                                                | 32                          | 23 | 26                              | 23 |
| 60+ years                                                  | 7                           | 5  | 8                               | 7  |
| <b>Gender</b>                                              |                             |    |                                 |    |
| Female                                                     | 129                         | 92 | 100                             | 90 |
| Male                                                       | 11                          | 8  | 11                              | 10 |
| <b>Hispanic/Latino/Spanish origin</b>                      |                             |    |                                 |    |
| Yes                                                        | 21                          | 15 | 24                              | 22 |
| No                                                         | 119                         | 85 | 87                              | 73 |
| <b>English as primary language</b>                         |                             |    |                                 |    |
| Yes                                                        | 134                         | 96 | 104                             | 94 |
| No                                                         | 6                           | 4  | 7                               | 6  |
| <b>Education Level</b>                                     |                             |    |                                 |    |
| High school diploma/GED                                    | 15                          | 11 | 15                              | 14 |
| Associate's/2-year degree/some college                     | 58                          | 41 | 46                              | 41 |
| Bachelor's degree/some graduate school                     | 47                          | 34 | 32                              | 29 |
| Graduate/professional degree                               | 20                          | 14 | 18                              | 16 |
| <b>Lived Experience</b>                                    |                             |    |                                 |    |
| Yes                                                        | 134                         | 96 | 101                             | 91 |
| No                                                         | 6                           | 4  | 10                              | 9  |
| <b>Working as an FPA *</b>                                 |                             |    |                                 |    |
| Yes, paid                                                  | 95                          | 68 | 36                              | 32 |
| Yes, unpaid                                                | 3                           | 2  | 4                               | 4  |
| No                                                         | 42                          | 30 | 71                              | 64 |
| <b>Work status of FPAs</b>                                 |                             |    |                                 |    |
| Full-time                                                  | 57                          | 41 | 25                              | 23 |
| Part-time                                                  | 46                          | 33 | 16                              | 14 |
| N/A (not currently working as an FPA)                      | 37                          | 26 | 70                              | 63 |
| <b>Current Employer</b>                                    |                             |    |                                 |    |
| Family run/family peer support agency                      | 33                          | 24 | 15                              | 14 |
| Mental health agency                                       | 39                          | 28 | 31                              | 28 |
| Substance use services agency                              | 8                           | 6  | 4                               | 4  |
| Juvenile Justice/probation/family court agency             | 0                           | 0  | 0                               | 0  |
| Foster care/child welfare preventative/protective services | 2                           | 1  | 5                               | 5  |
| Developmental disabilities services                        | 3                           | 2  | 4                               | 4  |

|                                                         |     |    |    |    |
|---------------------------------------------------------|-----|----|----|----|
| Managed care organization                               | 7   | 5  | 2  | 2  |
| School district/BOCES                                   | 1   | 1  | 3  | 3  |
| Other                                                   | 34  | 24 | 19 | 17 |
| Not working as an FPA                                   | 13  | 9  | 28 | 25 |
| <b>Working within residential or inpatient settings</b> |     |    |    |    |
| Yes                                                     | 23  | 16 | 15 | 14 |
| No                                                      | 78  | 56 | 26 | 23 |
| N/A (not currently working as an FPA)                   | 39  | 28 | 70 | 63 |
| <b>FPA Credential Required *</b>                        |     |    |    |    |
| Yes                                                     | 100 | 71 | 45 | 41 |
| No                                                      | 8   | 6  | 22 | 20 |
| I don't know                                            | 13  | 9  | 4  | 4  |
| N/A (not currently working as an FPA)                   | 19  | 14 | 40 | 36 |

\*  $p < 0.050$

FPA = Family Peer Advocate

Table B. Parent Empowerment Program (PEP) Training Modules

| <b>Parent Empowerment Program (PEP) Family Peer Advocate Training</b>                |                                                                                                                             |                                                                  |
|--------------------------------------------------------------------------------------|-----------------------------------------------------------------------------------------------------------------------------|------------------------------------------------------------------|
| <b>Level 1 Training</b>                                                              |                                                                                                                             |                                                                  |
| <i>Required for Provisional FPA Credential</i>                                       | <b><i>Level 1 Required Online Training Modules</i></b>                                                                      |                                                                  |
|                                                                                      | 1.1                                                                                                                         | Family Peer Support Services and the Family Peer Advocate Role   |
|                                                                                      | 1.2                                                                                                                         | Family-Driven Care                                               |
|                                                                                      | 1.3                                                                                                                         | The Power of Lived Experience                                    |
|                                                                                      | 1.4                                                                                                                         | Embracing Each Family’s Culture                                  |
|                                                                                      | 1.5                                                                                                                         | Effective Communication Skills for Family Peer Advocates         |
|                                                                                      | 1.6                                                                                                                         | Engagement Strategies for Family Peer Advocates                  |
|                                                                                      | 1.7                                                                                                                         | Learning About Families: Exploring Strengths, Needs, and Culture |
|                                                                                      | 1.8                                                                                                                         | Creating a Plan to Support Families                              |
|                                                                                      | 1.9                                                                                                                         | Empowerment Strategies for Family Peer Advocates                 |
|                                                                                      | 1.10                                                                                                                        | Developing Effective Partnerships                                |
|                                                                                      | 1.11                                                                                                                        | Recognizing and Responding to Crisis and Safety Concerns         |
|                                                                                      | 1.12                                                                                                                        | Professionalism                                                  |
|                                                                                      | 1.13                                                                                                                        | Education                                                        |
| 1.14                                                                                 | Mental Health                                                                                                               |                                                                  |
| <b>Level 2 Training</b>                                                              |                                                                                                                             |                                                                  |
| <i>Required for Professional FPA Credential</i>                                      | <b><i>A. Required Online Training Modules</i></b>                                                                           |                                                                  |
|                                                                                      | 2.1                                                                                                                         | The Importance of Self-Care                                      |
|                                                                                      | 2.2                                                                                                                         | Documenting Your Work                                            |
|                                                                                      | 2.3                                                                                                                         | Measuring the Impact of Your Work with Families                  |
|                                                                                      | 2.4                                                                                                                         | Building Community Connections Through Groups                    |
|                                                                                      | 2.5                                                                                                                         | Empowering Parents in their Parenting Role                       |
|                                                                                      | 2.6                                                                                                                         | Trauma Informed Care                                             |
|                                                                                      | <b><i>B. In-Person Training (2 days)</i></b>                                                                                |                                                                  |
|                                                                                      | Engagement, Communication, and Empowerment Strategies                                                                       |                                                                  |
|                                                                                      | Putting it All Together: Assessment, Goal Development, Progress Evaluation, Plan Revision, Structuring for Self-Sufficiency |                                                                  |
| <b><i>C. Coaching Calls</i></b>                                                      |                                                                                                                             |                                                                  |
| 12 one-hour long calls to reinforce application of skills and competency in practice |                                                                                                                             |                                                                  |
| <b>Continuing Education Modules</b>                                                  |                                                                                                                             |                                                                  |
|                                                                                      | C1                                                                                                                          | Supporting Parents of Transition Age Youth                       |
|                                                                                      | C2                                                                                                                          | Building Community Connections and Natural Supports              |
|                                                                                      | C3                                                                                                                          | Early Intervention                                               |
|                                                                                      | C4                                                                                                                          | Juvenile Justice                                                 |
|                                                                                      | C5                                                                                                                          | Child Welfare                                                    |
|                                                                                      | C6                                                                                                                          | Substance Use                                                    |
|                                                                                      | <i>Other continuing education modules to be developed</i>                                                                   |                                                                  |
